# Regulatory networks of non-coding RNAs in brown/beige adipogenesis

Shaohai Xu\*†, Peng Chen‡ and Lei Sun\*§<sup>1</sup>

\*Cardiovascular and Metabolic Disorders Program, Duke-NUS Graduate Medical School, 8 College Road, Singapore 169857, Singapore  
†School of Nuclear Science and Technology, University of Science and Technology of China, 443 Huangshan Road, Hefei, Anhui 230027, P.R. China

‡Division of Bioengineering, Nanyang Technological University, 70 Nanyang Drive, Singapore 637457

§Institute of Molecular and Cell Biology, 61 Biopolis Drive, Proteos, Singapore 138673, Singapore

## Synopsis

BAT (brown adipose tissue) is specialized to burn fatty acids for heat generation and energy expenditure to defend against cold and obesity. Accumulating studies have demonstrated that manipulation of BAT activity through various strategies can regulate metabolic homeostasis and lead to a healthy phenotype. Two classes of ncRNA (non-coding RNA), miRNA and lncRNA (long non-coding RNA), play crucial roles in gene regulation during tissue development and remodelling. In the present review, we summarize recent findings on regulatory role of distinct ncRNAs in brown/beige adipocytes, and discuss how these ncRNA regulatory networks contribute to brown/beige fat development, differentiation and function. We suggest that targeting ncRNAs could be an attractive approach to enhance BAT activity for protecting the body against obesity and its pathological consequences.

**Key words:** brown/beige adipocyte, lncRNA, miRNA, obesity.

Cite this article as: Bioscience Reports (2015) 35, e00262, doi:10.1042/BSR20150155

## BAT ADIPOGENESIS AND ITS MODULATORS

BAT (brown adipose tissue), a specialized mammalian organ, is distinguished from WAT (white adipose tissue) by its location, morphology and physiological function [1]. BAT promotes energy expenditure via uncoupled respiration mediated by mitochondrial UCPI (uncoupling protein 1) [2]. Another type of adipocyte expressing UCPI is referred as beige or brite (brown in white) adipocyte and regarded as a non-classical/inducible brown adipocyte [3,4]. Ablation of BAT can induce obesity and metabolic diseases [5]; in contrast, enhancing BAT activity and function through different strategies leads to increased energy expenditure against obesity [6]. Therefore manipulation of BAT mass and function is an attractive therapeutic approach for obesity-associated metabolic syndrome and its complications.

There has been an upsurge of interest in understanding the mechanism underlying brown/beige adipogenesis. The master regulator of brown fat development is PRDM16 (PR domain-

containing 16) which specifies the brown fat lineage from white fat and muscle [7]. It drives brown adipocyte development by binding and activating the transcriptional cofactors PGC-1 $\alpha$  [PPAR (peroxisome-proliferator-activated receptor)  $\gamma$  co-activator 1 $\alpha$ ], PGC-1 $\beta$ , PPAR $\alpha$  and PPAR $\gamma$  to induce brown-fat-selective genes, and by interacting with transcriptional corepressors such as CtBP1 (C-terminal binding protein 1) and CtBP2 to repress white-fat-cell-selective genes [8,9]. In addition, a variety of extrinsic or intrinsic protein factors have been identified as regulators for BAT adipogenesis and physiological function (Figure 1). These studies have been reviewed in other excellent articles [6,10–13] and so we will not discuss these extensively in the present review.

In the present review, we focus on the function of ncRNA (non-coding RNA) in brown/beige fat development and consider two distinct subsets of ncRNAs: the 20–24-nt miRNA, and the lncRNA (long non-coding RNA), which is arbitrarily classified as RNA longer than 200 nt [14]. miRNA is evolutionarily conserved and recognizes its target mRNA by imperfect pairing between its seed sequence and mRNA. Paired miRNA–mRNA together

**Abbreviations:** BAT, brown adipose tissue; Blnc1, brown fat lncRNA 1; C/EBP CCAAT/enhancer-binding protein; CtBP C-terminal binding protein; DGCR8, DiGeorge syndrome critical region 8; EBF2, early B-cell factor 2; eWAT, epididymal WAT; FGF, fibroblast growth factor; Firre, functional intergenic repeating RNA element; HFD, high-fat diet; hnRNPU, heterogeneous nuclear ribonucleoprotein U; Hox, homeobox; lnc-BATE, lncRNA BAT-enriched; lnc-RAP-n, lncRNA Regulated in AdipoGenesis; lncRNA, long non-coding RNA; MEF2, myocyte enhancer factor 2; ncRNA, non-coding RNA; PGC, PPAR $\gamma$  co-activator; PPAR, peroxisome-proliferator-activated receptor; PRDM16, PR domain-containing 16; SAT, subcutaneous adipose tissue; SVF, stromal-vascular fraction; TGF $\beta$ <sub>1</sub>, transforming growth factor  $\beta$ 1; UCPI, uncoupling protein 1; WAT, white adipose tissue.

<sup>1</sup> To whom correspondence should be addressed (email sun.lei@duke-nus.edu.sg).

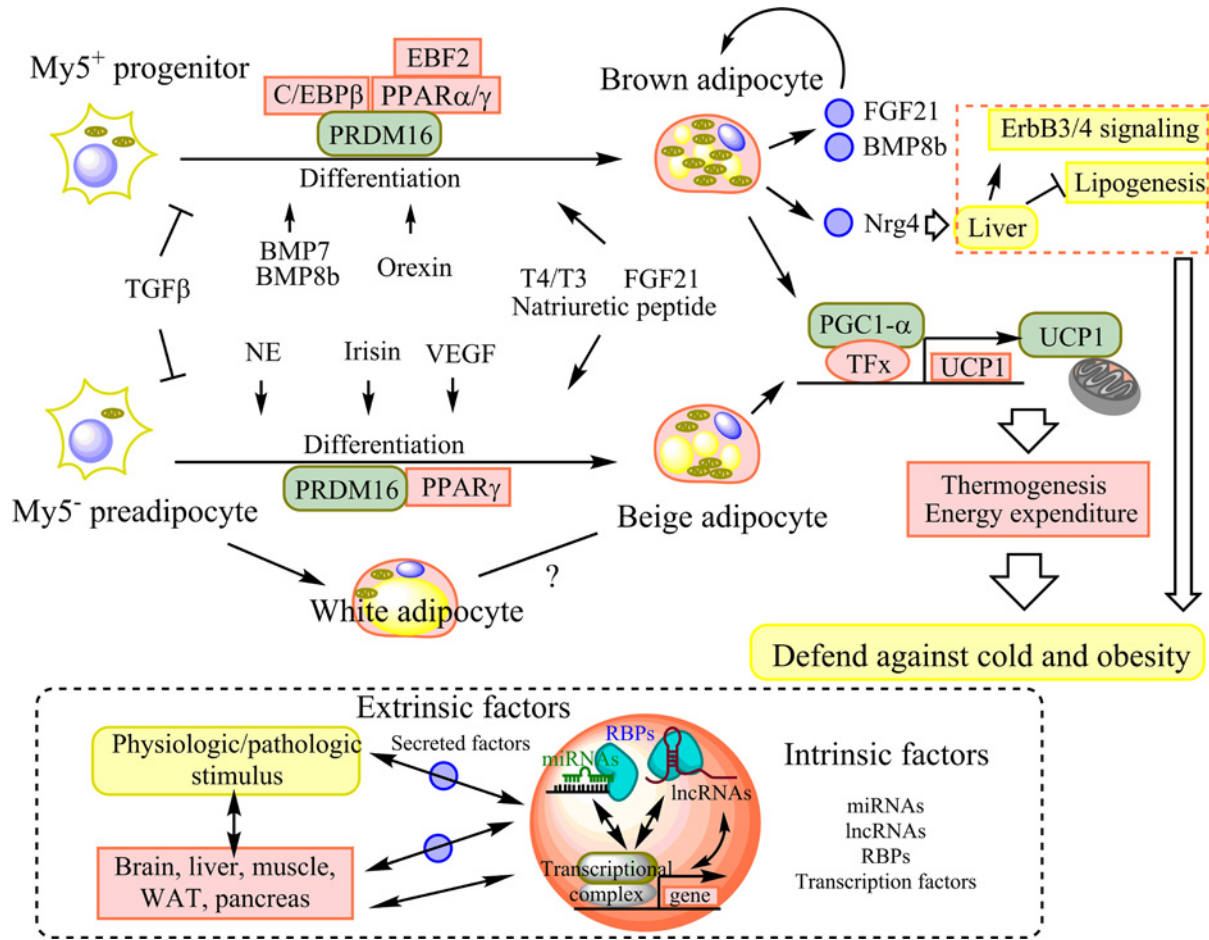

**Figure 1** Key protein/ncRNA regulatory networks regulate brown/beige adipogenesis

Brown and beige adipocytes originate from distinct progenitors, and are differently influenced either by extrinsic factors indirectly regulating key transcription factors (such as PRDM16 and PPAR $\gamma$ ), or through mobilizing intrinsic factors (such as ncRNA). BAT executes its metabolic function mainly by fuel oxidation and UCP1-mediated thermogenesis to defend against cold and obesity. For detailed descriptions of these proteins and ncRNAs, see the text. BMP, bone morphogenetic protein; NE, noradrenaline (norepinephrine); RBP, RNA-binding protein; T3, 3,3',5-tri-iodothyronine; T4, thyroxine; TFx, thyroid receptor; VEGF, vascular endothelial growth factor.

with Argonaute protein form a RNA–protein complex, miRISC (miRNA-induced silencing complex), in which miRNA induces target mRNA translational repression and/or AGO2 (Argonaute 2)-mediated mRNA cleavage [15,16]. In contrast, lncRNA has poor sequence conservation, and through its primary, secondary and tertiary structures, interacts with RBPs (RNA-binding proteins) to regulate gene expression at transcriptional or post-transcriptional levels [14,17]. Transcriptome studies have revealed distinctive expression patterns of ncRNA in different adipose depots, a dynamic change in ncRNA expression during BAT and WAT adipogenesis and functional importance of these ncRNAs in these biological processes [14,18–20]. In the present review, we aim to cover the recent advances in understanding the role of ncRNAs in brown/beige adipocyte biology (Table 1 and Figure 1) and point out that manipulating ncRNAs could be a novel therapeutic approach for combating metabolic diseases. Because of limitations of space, it is impossible to cover

all articles published in this rapid growing field, so we only focus on a few seminal pioneering studies and some recent studies with physiological evidence. We apologize for many excellent studies that are not discussed in the present review.

## FUNCTION OF miRNAs IN BROWN/BEIGE FAT DEVELOPMENT AND PHYSIOLOGY

### DGCR8 or Dicer adipose-knockout impairs the function of BAT

To determine the role of miRNA, as a whole, in adipose tissue, several mouse strains of adipose-specific knockout of DGCR8 (DiGeorge syndrome critical region 8) or Dicer, two key regulators of miRNA biogenesis pathways, have been generated [18,21];

**Table 1** miRNAs that regulate brown/beige fat cell adipogenesis and physiological function

| miRNA               | Expression profile | Function                          | Phenotype of miRNA transgenic or knockout mouse                                                |
|---------------------|--------------------|-----------------------------------|------------------------------------------------------------------------------------------------|
| <i>miR-193b-365</i> | BAT, WAT, other    | Promotes brown adipogenesis       | No transgenic mice                                                                             |
| <i>miR-133</i>      | Muscle, BAT, SAT   | Inhibits brown/beige adipogenesis | Knockout mice: SAT browning, increased insulin sensitivity and glucose tolerance               |
| <i>miR-196a</i>     | BAT, SAT           | Promotes beige adipogenesis       | Transgenic mice: enhanced energy expenditure, resistance to obesity and the metabolic syndrome |
| <i>miR-155</i>      | BAT, WAT           | Inhibits brown/beige adipogenesis | Transgenic mice: reduced BAT mass; knockout mice: increased ability to adapt to cold exposure  |
| <i>miR-27</i>       | BAT, WAT           | Inhibits brown/beige adipogenesis | No transgenic mice                                                                             |
| <i>miR-378</i>      | Muscle, BAT, WAT   | Promotes brown adipogenesis       | Transgenic mice: increased BAT mass, prevent both genetic and HFD-induced obesity              |
| <i>miR-34a</i>      | Liver, BAT, WAT    | Inhibits brown/beige adipogenesis | No transgenic mice                                                                             |

In addition, a tamoxifen-inducible Dicer-knockout strain has also been generated [21]. Both DGCR8- and Dicer-knockout mice display enlarged but pale interscapular brown fat with reduced BAT marker expression, accompanied by an impairment of insulin sensitivity. Although deletion of DGCR8 or Dicer results in different defects in WAT, both of them impair WAT browning upon exposure to cold [18,21]. These results demonstrate that miRNA plays a critical role in BAT development, WAT browning and brown/beige fat physiology.

It is interesting to introduce key miRNAs into DGCR8- or Dicer-knockout brown adipocytes and determine their sole contribution to brown adipocyte biology. Because global miRNA biogenesis has been blocked in DGCR8- or Dicer-knockout mice, these strains provide a clean background to identify the core set of miRNAs that are sufficient to support brown fat development. It has been reported that, in the Dicer-knockout brown adipocytes, reintroduction of *miR-346* and *miR-362* partially reverses the decrease in C/EBP $\beta$  (CCAAT/enhancer-binding protein  $\beta$ ), whereas re-expression of *miR-365* increases *UCPI* mRNA expression 20-fold [21]. Another advantage of these platforms is to facilitate the identification of miRNA targets. Because mRNA targets are normally repressed by multiple miRNAs, the effect of a single miRNA is often masked by other miRNAs targeting the same mRNA. However, in the absence of other miRNAs, the effect of a given miRNA will be more evident when it is introduced back to DGCR8- or Dicer-knockout cells.

### Critical functional miRNAs in brown/beige adipocytes

miRNAs execute their regulatory function by participating in signalling networks and fine-tuning or switching signalling output levels [22]. Recent studies have identified several miRNAs functioning in different stages of brown/beige fat adipogenesis [23]; these regulatory networks are summarized as follows (Figure 2).

#### miR-193b-365

Using microarray methods, researchers have identified a list of miRNAs enriched in BAT compared with WAT, among which

*miR-193b* and *miR-365* are a bicistronic transcript [24]. The level of *miR-193b-365* is significantly up-regulated during brown adipogenesis. This miRNA cluster is needed for lineage-specific brown adipogenesis, as established by both overexpression and inhibition experiments. Blocking *miR-193b-365* causes a remarkable reduction in lipid accumulation during adipogenesis, whereas ectopic expression of *miR-193b* decreases mRNA levels of myogenic markers on C2C12 myoblasts and up-regulates mRNA levels of two master adipogenic factors, PPAR $\gamma$  and C/EBP $\alpha$ , thus inducing a transition of myoblasts to brown adipocytes under adipogenic differentiation conditions. *miR-193b* executes these function at least by directly repressing *Cdon* (cell adhesion-associated, oncogene-regulated), *Igfbp5* (insulin-like growth factor-binding protein 5) (two pro-myogenic factors) and *Runx1t1* (runt-related transcription factor 1 translocated to 1) (an inhibitor of brown adipogenesis) [25]. This regulatory network is initiated by the brown lineage determination factor PRDM16, as PRDM16 induces *miR-193b-365* expression at least partially by inducing expression of its transcription factor PPAR $\alpha$ . Therefore *miR-193b-365* represents a new part of the PRDM16-induced programme. However, blocking *miR-193b-365* with miRNA inhibitors in mature brown adipocytes does not affect the expression of key brown adipocyte genes, indicating that this gene cluster carries out its primary function during development. Screening for miRNAs essential for maintenance of BAT features requires further investigation [24].

#### miR-133

On the basis of profiling analysis of miRNAs in BAT before and after cold exposure, RNA sequencing for differentially expressed miRNAs between satellite cells and brown pre-adipocytes, and through bioinformatic analysis predicting PRDM16 targets, several groups have successively revealed *miR-133* as a critical regulator of adipocyte browning [26–28].

*miR-133* belongs to a group of myomiRs (muscle-specific miRNAs) and is a potent repressor of non-muscle genes, thereby playing a role in embryonic stem cell differentiation and muscle specification [29,30]. *miR-133* serves as a major negative

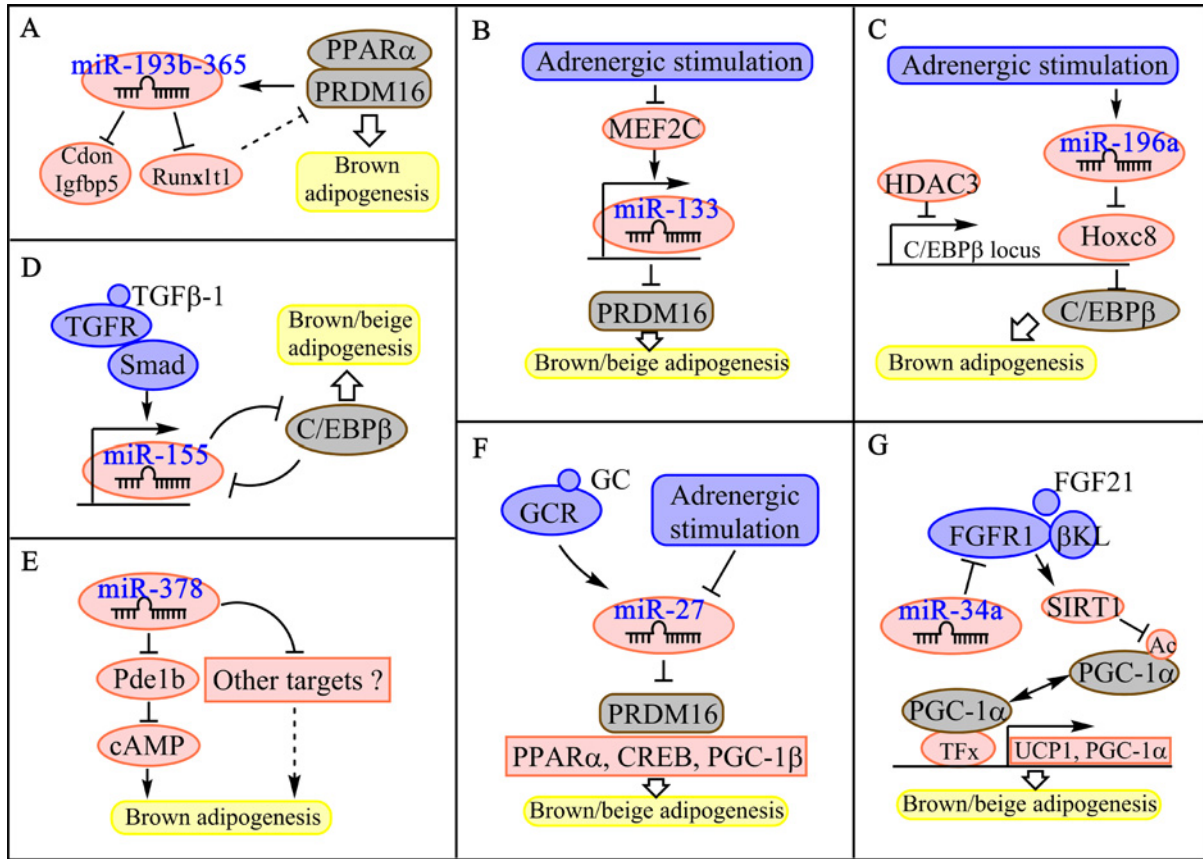

**Figure 2** Key miRNA regulatory networks in brown/beige adipogenesis

(A) Under the control of PRDM16, *miR-193b-365* promotes brown adipogenesis by targeting *Runx1t1*, *Cdon* and *Igfbp5*. (B) *miR-133*, transcriptionally controlled by MEF2, serves as a major negative regulator of brown/beige adipogenesis by directly targeting *PRDM16*. (C) *miR-196a* targets *Hoxc8* to up-regulate C/EBP $\beta$  for beige adipogenesis. HDAC3, histone deacetylase 3. (D) *miR-155* forms a bistable feedback loop with its target C/EBP $\beta$  and maintains the balance between proliferation and differentiation of brown pre-adipocytes. TGFR, TGF receptor; (E) *miR-378* promotes BAT differentiation and expansion partly through targeting *Pde1b* to elevate cAMP content. (F) *miR-27* targets several key brown transcription factors in response to both glucocorticoid (GC) signal and adrenergic-stimuli-induced brown/beige adipogenesis. CREB, cAMP-response-element-binding protein; GCR, glucocorticoid receptor. (G) *miR-34a* exerts roles in multiple tissues through targeting FGF signalling to up-regulate thermogenic genes such as those encoding PGC-1 $\alpha$  and UCP1. Ac, acetyl;  $\beta$ KL,  $\beta$ -Klotho; SIRT1, sirtuin 1; TFx, thyroid receptor.

regulator of brown/beige adipogenesis. It has a distinct expression pattern among myogenic and brown adipogenic lineages, and their progenitors. The level of *miR-133* is down-regulated during the induction of brown adipocyte differentiation and in BAT after cold exposure [26,27]. The down-regulation of *miR-133* is inversely correlated with PRDM16 and UCP1 expression levels. Functional assays for miRNA target identification reveal that both *miR-133a* and *miR-133b* directly target the conserved 8-nt seed sequences in the 3'UTR of *PRMD16* mRNA [26–28]. Moreover, overexpression of *miR-133* in brown pre-adipocytes dramatically decreases the mRNA level of PRDM16, as well as other brown adipogenic markers and general adipogenic markers [27], but increases myogenic markers [26]. By contrast, inhibition of *miR-133* causes an increase in BAT transcription factors PPAR $\gamma$  and PPAR $\alpha$ , and a decrease in myogenic markers [26].

Therefore the brown lineage commitment is influenced directly by *miR-133* through targeting PRDM16. *miR-133* is regulated directly by MEF2 (myocyte enhancer factor 2) during adrenergic-stimuli-induced BAT development and differentiation. Adrenergic stimulation upon cold exposure leads to a decrease in MEF2, resulting in a reduced expression of *miR-133* and an increased expression of PRDM16, which facilitates brown lineage commitment [26].

Inhibition of *miR-133* during BAT differentiation causes enhanced mitochondrial activity and BAT programme, leading to an increase in the basal oxygen consumption rate [26]. Similar modulations are observed in the progression of frozen injury-induced muscle regeneration in which *miR-133* antagonism induces an increase in uncoupled respiration, glucose uptake and thermogenesis in intramuscular brown adipocytes [27].

The bioenergetic effects of *miR-133* antagonism on muscle cells make it a critical modulator of whole-body energy expenditure: antagonism of *miR-133* in mice fed with either a normal diet or an HFD (high-fat diet) display a significant increase in total energy expenditure, without much change in physical activity and food intake. Moreover, antagonism of *miR-133* leads to improved glucose tolerance and decreased infiltration of inflammatory cells in eWAT (epididymal WAT) [27]. Consistent with this, knockout of *miR-133* in mice leads to SAT (subcutaneous adipose tissue) browning and increased insulin sensitivity [28]. All of these studies indicate that *miR-133* can serve as a therapeutic target to defend against diet-induced obesity.

### miR-196a

*miR-196a* expression is induced in SVF (stromal-vascular fraction) cells during brown adipogenesis by an adenylate cyclase activator, forskolin, or cold exposure [31]. The *miR-196a* gene is located within the gene clusters encoding the Hox (homeobox) family, which plays a role in system differentiation including adipogenesis [31,32]. One of the Hox genes, *Hoxc8*, is categorized as a white-fat gene and a repressor of brown adipogenesis [33]. *Hoxc8* targets the *C/EBP $\beta$*  regulatory sequence and represses *C/EBP $\beta$* , a positive regulator of the BAT programme. During the brown adipogenesis of white fat progenitors, the expression of *Hoxc8* is suppressed directly by *miR-196a*, which facilitates the browning progression. In iBAT (interscapular BAT)-SVF cells, *miR-196a* is barely expressed, and its target *Hoxc8* is even absent, which implies that *miR-196a* does not play a role in conventional brown adipogenesis [31]. Fat-specific *miR-196a* transgenic mice generate metabolically functional beige cells in WAT, and exhibit enhanced energy expenditure, improved glucose metabolism and resistance to obesity. Therefore manipulation of *miR-196a*–*Hoxc8*–*C/EBP $\beta$*  signalling in WAT progenitors to initiate browning can be a therapeutic strategy for obesity-associated metabolic consequences.

### miR-155

TGF $\beta_1$  (transforming growth factor  $\beta_1$ ) potently inhibits adipogenesis, and knockout of *Smad3* induces the WAT to BAT phenotypic transition [34,35]. A recent study demonstrated that the inhibitory effect of TGF $\beta_1$ /*Smad* signalling on brown fat adiposity is partly exerted through induction of *miR-155* [36]. *miR-155* is highly expressed in pre-adipocytes, but decreases dramatically after induction of differentiation. It forms a bistable feedback loop with its target *C/EBP $\beta$*  to maintain the balance between proliferation and differentiation of brown pre-adipocytes. *miR-155* transgenic mice display reduced BAT mass, whereas *miR-155*-knockout mice show a better adaption to cold exposure by recruiting brite fat cells (inducible beige cells) and enhancing differentiation of BAT [36]. These data demonstrate that *miR-155* serves as a negative regulator for brown fat differentiation.

### miR-27

A single miRNA family can regulate a large number of targets, some of which may be involved in the same biological process or signalling pathway [16,23]. *miR-27a/miR-27b* is such a miRNA family, which serves as an upstream regulator of brown/beige adipogenesis by directly targeting several key transcription factors such as PRDM16, PPAR $\alpha$ , CREB (cAMP-response-element-binding protein) and PGC-1 $\beta$  [37]. Moreover, antagonizing *miR-27b* function prevents dexamethasone (one type of glucocorticoid) induced inhibition of BAT differentiation in primary adipocytes, and improves glucocorticoid treatment-induced central fat accumulation and metabolic dysfunction in mice. Glucocorticoid induces the expression of *miR-27b* through glucocorticoid receptor-mediated transcriptional regulation [38]. Therefore *miR-27* is a responder of glucocorticoid signal, as well as a central regulator of brown/beige adipogenesis.

### miR-378

*miR-378* resides in the gene locus of PGC-1 $\beta$  and is induced during brown adipogenesis. *miR-378* promotes BAT differentiation and expansion, but suppresses the formation of beige adipocytes in subcutaneous WAT. *miR-378* directly targets *Pde1b* (phosphodiesterase 1b) that catalyses the turnover of cAMP [39]. This may be one of the regulators in BAT activity and expansion, as single nucleotide polymorphisms in the *Pde1b* gene are associated with cattle back-fat thickness, and cAMP can potentiate adipocyte differentiation [40,41]. Indeed, *miR-378* transgenic mice display elevated cAMP levels which leads to increased lipolysis and activity in BAT, accompanied with enlarged organ mass and improved metabolic profile.

### miR-34a

Upon cold exposure, 3T3-L1 fat cells display a marked decrease in *miR-34a* and an increase in browning-related genes, such as those encoding UCP1, PGC-1 $\alpha$  and PRDM16. This inverse correlation is also observed in adipose tissue, which suggests that *miR-34a* inhibits fat browning [42]. Mechanistically, *miR-34a* directly targets FGFR1 (fibroblast growth factor receptor 1) to attenuate FGF21 (fibroblast growth factor 21)/SIRT1 (sirtuin 1)-dependent deacetylation of PGC-1 $\alpha$ , which controls the browning transcriptional programme [42,43]. Circulating FGF21, an endocrine mitokine, enhances fatty acid  $\beta$ -oxidation in liver and adipose tissue, induces WAT browning, and promotes protection from diet-induced obesity and insulin resistance [44]. The integrated actions from multiple tissues induced by FGF21 signalling makes its upstream *miR-34a* a potent modulator in metabolic regulatory networks. Importantly, beneficial effects mediated by inhibition of *miR-34a* in HFD-fed mice include several aspects, including reduced adiposity and improved serum profiles [42]; *miR-34a* inhibition induces browning in all types of WAT, and promotes a more robust BAT programme [42]. These distinctive effects imply that *miR-34a* exerts roles in multiple tissues through targeting FGF signalling.

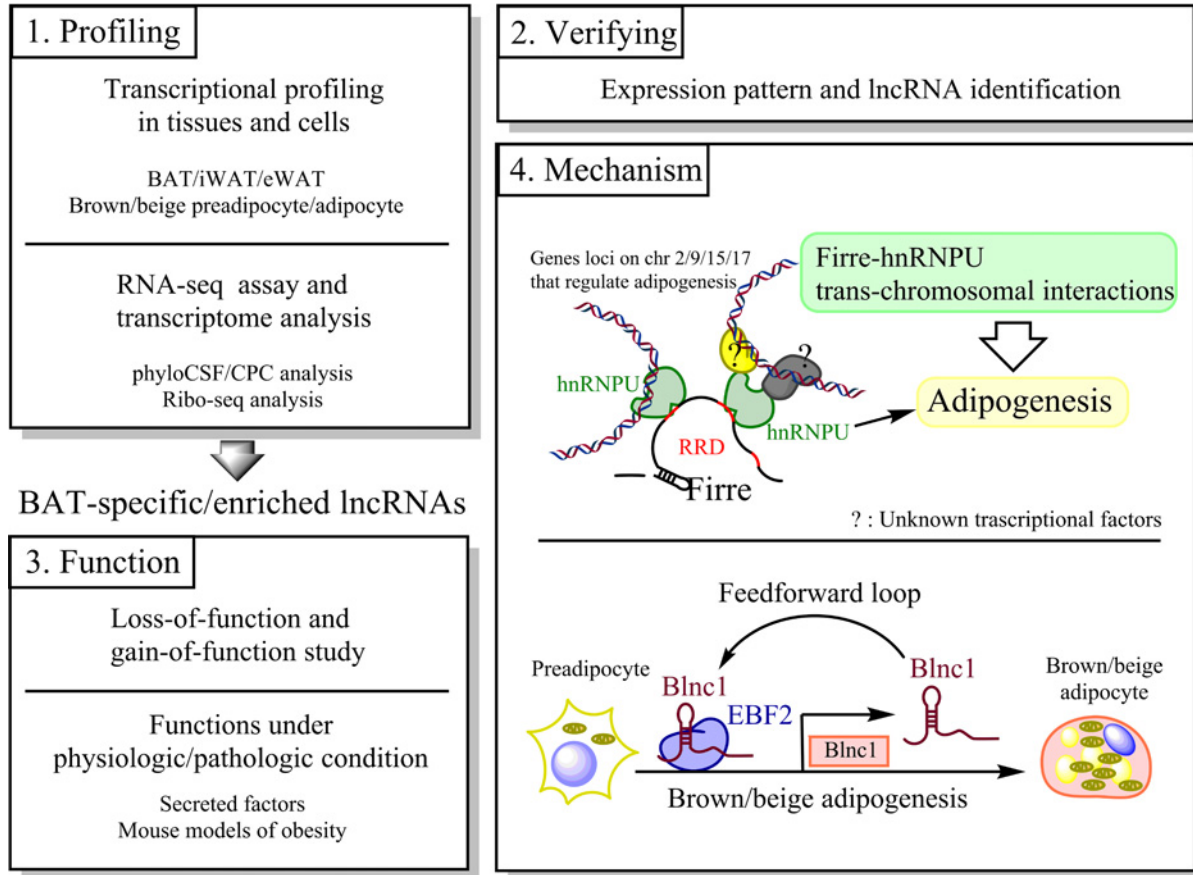

**Figure 3** **lncRNAs in BAT adipogenesis**

The research route for exploiting lncRNAs in BAT adipogenesis contains four steps: 1, transcriptional profiling; 2, verifying lncRNAs; 3, functional study; and 4, mechanism exploring. Two examples for regulatory mechanisms of lncRNAs in BAT are presented (upper panel: Firre–hnRNP interplay-mediated *trans*-chromosomal interactions promotes adipogenesis; lower panel: Blnc1 *cis*-regulates EBF2, and Blnc1–EBF2 forms a feedforward loop to promote brown/beige adipogenesis). iWAT, inguinal WAT.

## FUNCTION OF lncRNAs IN BROWN/BEIGE FAT

The function of lncRNAs in BAT is poorly understood despite existing reports on their expression pattern in BAT [45,46]. Using massively parallel sequencing of polyadenylation-selected RNAs, researchers have identified 175 lncRNAs which are regulated during adipogenesis. Further RNAi-mediated loss-of-function experiments have characterized ten lncRNAs that are required for adipogenesis and are referred to as lnc-RAP-*n* (lncRNA Regulated in Adipogenesis) [47]. One of them, lnc-RAP-1 (or Firre, functional intergenic repeating RNA element) interacts with the nuclear matrix factor hnRNP (heterogeneous nuclear ribonucleoprotein U) to mediate *trans*-chromosomal interactions, and brings loci encoding known regulators of adipogenesis into close proximity. This hnRNP–Firre-mediated interaction may be required for proper function of multiple biological processes including adipogenesis [48].

This study is mainly based on the WAT system, but the role of lncRNA in brown adipocyte differentiation is not well understood. A recent research has identified Blnc1 (brown fat lncRNA 1) as a BAT-enriched lncRNA, which promotes brown and beige adipocyte differentiation through a ribonucleoprotein complex formed with EBF2 (early B-cell factor 2) to enhance expression of thermogenic genes such as UCP1. This regulation pattern is feedforward because Blnc1 itself is positively regulated by EBF2 [49].

These previous studies suffer from an incomplete annotation of lncRNA in adipose tissue. To address this obstacle, our group performed deep RNA-seq from BAT, inguinal WAT and eWAT, which provides us with approximately half a billion of reads for transcriptome reconstruction. We developed a computational pipeline and identified more than 1500 lncRNAs expressed in adipose tissue. Of these, 127 are BAT-restricted, and many of them are targeted by key adipogenic regulators such as PPAR $\gamma$  and C/EBP $\alpha$  [50]. Since they are BAT-enriched, we refer to them as lnc-BATEs. lnc-BATE1 is up-regulated 30-fold during

adipogenesis and is required for brown adipogenesis and the maintenance of brown adipocyte features. lnc-BATE1 specifically binds the nuclear matrix factor hnRNPU; both of them are required for proper brown adipogenesis [48,50], but how this ribonucleotide complex exerts its functions is not well understood and requires further investigation.

Manipulation of BAT and WAT browning has been linked to a healthy metabolic phenotype and a defence against obesity and the metabolic syndrome. Several recent studies have identified new BAT-specific lncRNAs and revealed that some of them, such as lnc-BATE1 and Blnc1, promote brown and/or beige adipocyte differentiation and physiological function (Figure 3). Although the detailed regulatory networks and mechanisms are still not fully understood, lncRNAs are promising therapeutic targets for obesity and associated metabolic diseases.

## CONCLUSIONS AND PERSPECTIVES

BAT protects against obesity by promoting energy expenditure via uncoupled respiration, and is regarded as an attractive therapeutic target organ for obesity and its pathological consequences [1]. In the present review, we have summarized the functional role of two types of intrinsic factor, miRNA and lncRNA, in brown/beige adipogenesis and physiological function. Increased expression of *miR-193b-365*, *miR-196a* and *miR-378* or inhibition of *miR-133*, *miR-155*, *miR-27* and *miR-34a* can promote brown fat adipogenesis. Although it is still insufficient to construct a whole miRNA regulatory network in BAT adipogenesis, these studies display explicit correlations among miRNAs themselves and their targeted signalling pathways. On this basis, further investigations will probably reveal the core set of miRNAs responsible for reconstructing BAT with higher activities.

Comparing with the relatively unifying molecular mechanism of miRNAs, the mechanisms used by lncRNAs are more diverse. Firre and lnc-BATE1 interact with nuclear matrix factor hnRNPU to make a spatial reconstruction of chromosome to bring a few metabolic genes into closer proximity which may lead to co-regulation [48]. EBF2 and its *cis*-regulator Blnc1 form a feed-forward loop to promote brown/beige adipogenesis [49]. More functional lncRNAs with different mechanisms are expected to emerge in the near future. These lncRNA studies, together with the miRNA study, will depict a new regulatory layer governing brown/beige fat plasticity under physiological and pathological conditions.

## FUNDING

This work was supported by a Singapore National Research Foundation (NRF) fellowship [grant number NRF-2011NRF-NRFF 001-025 (to L.S.)]. This research is also supported by the Singapore National Research Foundation (NRF) under its Co-operative Basic Research Grant (CBRG) [grant number NMRC/CBRG/0070/2014] and administered by the Singapore Ministry of Health's National Medical Research Council.

## REFERENCES

- Rosen, E.D. and Spiegelman, B.M. (2014) What we talk about when we talk about fat. *Cell* **156**, 20–44 [CrossRef PubMed](#)
- Krauss, S., Zhang, C.Y. and Lowell, B.B. (2005) The mitochondrial uncoupling-protein homologues. *Nat. Rev. Mol. Cell Biol.* **6**, 248–261 [CrossRef PubMed](#)
- Guerra, C., Koza, R.A., Yamashita, H., Walsh, K. and Kozak, L.P. (1998) Emergence of brown adipocytes in white fat in mice is under genetic control: effects on body weight and adiposity. *J. Clin. Invest.* **102**, 412–420 [CrossRef PubMed](#)
- Wu, J., Bostrom, P., Sparks, L.M., Ye, L., Choi, J.H., Giang, A.H., Khandekar, M., Virtanen, K.A., Nuutila, P., Schaart, G. et al. (2012) Beige adipocytes are a distinct type of thermogenic fat cell in mouse and human. *Cell* **150**, 366–376 [CrossRef PubMed](#)
- Lowell, B.B., S-Suselic, V., Hamann, A., Lawitts, J.A., Himms-Hagen, J., Boyer, B.B., Kozak, L.P. and Flier, J.S. (1993) Development of obesity in transgenic mice after genetic ablation of brown adipose tissue. *Nature* **366**, 740–742 [CrossRef PubMed](#)
- Harms, M. and Seale, P. (2013) Brown and beige fat: development, function and therapeutic potential. *Nat. Med.* **19**, 1252–1263 [CrossRef PubMed](#)
- Seale, P., Bjork, B., Yang, W., Kajimura, S., Chin, S., Kuang, S., Scime, A., Devarakonda, S., Conroe, H.M., Erdjument-Bromage, H. et al. (2008) PRDM16 controls a brown fat/skeletal muscle switch. *Nature* **454**, 961–967 [CrossRef PubMed](#)
- Kajimura, S., Seale, P., Kubota, K., Lunsford, E., Frangioni, J.V., Gygi, S.P. and Spiegelman, B.M. (2009) Initiation of myoblast to brown fat switch by a PRDM16-C/EBP- $\beta$  transcriptional complex. *Nature* **460**, 1154–1158 [CrossRef PubMed](#)
- Kajimura, S., Seale, P., Tomaru, T., Erdjument-Bromage, H., Cooper, M.P., Ruas, J.L., Chin, S., Tempst, P., Lazar, M.A. and Spiegelman, B.M. (2008) Regulation of the brown and white fat gene programs through a PRDM16/CtBP transcriptional complex. *Genes Dev.* **22**, 1397–1409 [CrossRef PubMed](#)
- Peirce, V., Carobbio, S. and Vidal-Puig, A. (2014) The different shades of fat. *Nature* **510**, 76–83 [CrossRef PubMed](#)
- Kajimura, S. and Saito, M. (2014) A new era in brown adipose tissue biology: molecular control of brown fat development and energy homeostasis. *Annu. Rev. Physiol.* **76**, 225–249 [CrossRef PubMed](#)
- Villarroya, F. and Vidal-Puig, A. (2013) Beyond the sympathetic tone: the new brown fat activators. *Cell Metab.* **17**, 638–643 [CrossRef PubMed](#)
- Lo, K.A. and Sun, L. (2013) Turning WAT into BAT: a review on regulators controlling the browning of white adipocytes. *Biosci. Rep.* **33**, art:e00065 [CrossRef](#)
- Knoll, M., Lodish, H.F. and Sun, L. (2015) Long non-coding RNAs as regulators of the endocrine system. *Nat. Rev. Endocrinol.* **11**, 151–160 [CrossRef](#)
- Valencia-Sanchez, M.A., Liu, J., Hannon, G.J. and Parker, R. (2006) Control of translation and mRNA degradation by miRNAs and siRNAs. *Genes Dev.* **20**, 515–524 [CrossRef PubMed](#)
- Guo, H., Ingolia, N.T., Weissman, J.S. and Bartel, D.P. (2010) Mammalian microRNAs predominantly act to decrease target mRNA levels. *Nature* **466**, 835–840 [CrossRef PubMed](#)
- Turner, M., Galloway, A. and Vigorito, E. (2014) Noncoding RNA and its associated proteins as regulatory elements of the immune system. *Nat. Immunol.* **15**, 484–491 [CrossRef PubMed](#)
- Kim, H.J., Cho, H., Alexander, R., Patterson, H.C., Gu, M., Lo, K.A., Xu, D., Goh, V.J., Nguyen, L.N., Chai, X. et al. (2014) MicroRNAs are required for the feature maintenance and differentiation of brown adipocytes. *Diabetes* **63**, 4045–4056 [CrossRef PubMed](#)
- Xie, H., Sun, L. and Lodish, H.F. (2009) Targeting microRNAs in obesity. *Expert Opin. Ther. Targets* **13**, 1227–1238 [CrossRef PubMed](#)

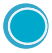

- 20 Alexander, R., Lodish, H. and Sun, L. (2011) MicroRNAs in adipogenesis and as therapeutic targets for obesity. *Expert Opin. Ther. Targets* **15**, 623–636 [PubMed](#)
- 21 Mori, M.A., Thomou, T., Boucher, J., Lee, K.Y., Lallukka, S., Kim, J.K., Torriani, M., Yki-Jarvinen, H., Grinspoon, S.K., Cypess, A.M. and Kahn, C.R. (2014) Altered miRNA processing disrupts brown/white adipocyte determination and associates with lipodystrophy. *J. Clin. Invest.* **124**, 3339–3351 [CrossRef PubMed](#)
- 22 Herranz, H. and Cohen, S.M. (2010) MicroRNAs and gene regulatory networks: managing the impact of noise in biological systems. *Genes Dev.* **24**, 1339–1344 [CrossRef PubMed](#)
- 23 Trajkovski, M. and Lodish, H. (2013) MicroRNA networks regulate development of brown adipocytes. *Trends Endocrinol. Metab.* **24**, 442–450 [CrossRef PubMed](#)
- 24 Sun, L., Xie, H., Mori, M.A., Alexander, R., Yuan, B., Hattangadi, S.M., Liu, Q., Kahn, C.R. and Lodish, H.F. (2011) *Mir193b-365* is essential for brown fat differentiation. *Nat. Cell Biol.* **13**, 958–965 [CrossRef PubMed](#)
- 25 Timmons, J.A., Wennmalm, K., Larsson, O., Walden, T.B., Lassmann, T., Petrovic, N., Hamilton, D.L., Gimeno, R.E., Wahlestedt, C., Baar, K. et al. (2007) Myogenic gene expression signature establishes that brown and white adipocytes originate from distinct cell lineages. *Proc. Natl. Acad. Sci. U.S.A.* **104**, 4401–4406 [CrossRef PubMed](#)
- 26 Trajkovski, M., Ahmed, K., Esau, C.C. and Stoffel, M. (2012) MyomiR-133 regulates brown fat differentiation through Prdm16. *Nat. Cell Biol.* **14**, 1330–1335 [CrossRef PubMed](#)
- 27 Yin, H., Pasut, A., Soleimani, V.D., Bentzinger, C.F., Antoun, G., Thorn, S., Seale, P., Fernando, P., van Ijcken, W., Grosveld, F. et al. (2013) MicroRNA-133 controls brown adipose determination in skeletal muscle satellite cells by targeting Prdm16. *Cell Metab.* **17**, 210–224 [CrossRef PubMed](#)
- 28 Liu, W., Bi, P., Shan, T., Yang, X., Yin, H., Wang, Y.X., Liu, N., Rudnicki, M.A. and Kuang, S. (2013) miR-133a regulates adipocyte browning *in vivo*. *PLoS Genet.* **9**, e1003626 [CrossRef PubMed](#)
- 29 Williams, A.H., Liu, N., van Rooij, E. and Olson, E.N. (2009) MicroRNA control of muscle development and disease. *Curr. Opin. Cell Biol.* **21**, 461–469 [CrossRef PubMed](#)
- 30 Chen, J.F., Mandel, E.M., Thomson, J.M., Wu, Q., Callis, T.E., Hammond, S.M., Conlon, F.L. and Wang, D.Z. (2006) The role of microRNA-1 and microRNA-133 in skeletal muscle proliferation and differentiation. *Nat. Genet.* **38**, 228–233 [CrossRef PubMed](#)
- 31 Mori, M., Nakagami, H., Rodriguez-Araujo, G., Nimura, K. and Kaneda, Y. (2012) Essential role for miR-196a in brown adipogenesis of white fat progenitor cells. *PLoS Biol.* **10**, e1001314 [CrossRef PubMed](#)
- 32 Narendra, V., Rocha, R.P., An, D., Raviram, R., Skok, J.A., Mazzoni, E.O. and Reinberg, D. (2015) CTCF establishes discrete functional chromatin domains at the Hox clusters during differentiation. *Science* **347**, 1017–1021 [CrossRef PubMed](#)
- 33 Schulz, T.J., Huang, T.L., Tran, T.T., Zhang, H., Townsend, K.L., Shadrach, J.L., Cerletti, M., McDougall, L.E., Giorgadze, N., Tchkonja, T. et al. (2011) Identification of inducible brown adipocyte progenitors residing in skeletal muscle and white fat. *Proc. Natl. Acad. Sci. U.S.A.* **108**, 143–148 [CrossRef PubMed](#)
- 34 Yadav, H., Quijano, C., Kamaraju, A.K., Gavrilova, O., Malek, R., Chen, W., Zerfas, P., Zhigang, D., Wright, E.C., Stuelten, C. et al. (2011) Protection from obesity and diabetes by blockade of TGF- $\beta$ /Smad3 signaling. *Cell Metab.* **14**, 67–79 [CrossRef PubMed](#)
- 35 Ignatz, R.A. and Massague, J. (1985) Type  $\beta$  transforming growth factor controls the adipogenic differentiation of 3T3 fibroblasts. *Proc. Natl. Acad. Sci. U.S.A.* **82**, 8530–8534 [CrossRef PubMed](#)
- 36 Chen, Y., Siegel, F., Kipschull, S., Haas, B., Frohlich, H., Meister, G. and Pfeifer, A. (2013) miR-155 regulates differentiation of brown and beige adipocytes via a bistable circuit. *Nat. Commun.* **4**, 1769 [CrossRef PubMed](#)
- 37 Sun, L. and Trajkovski, M. (2014) MiR-27 orchestrates the transcriptional regulation of brown adipogenesis. *Metabolism* **63**, 272–282 [CrossRef PubMed](#)
- 38 Kong, X., Yu, J., Bi, J., Qi, H., Di, W., Wu, L., Wang, L., Zha, J., Lv, S., Zhang, F. et al. (2015) Glucocorticoids transcriptionally regulate miR-27b expression promoting body fat accumulation via suppressing the browning of white adipose tissue. *Diabetes* **64**, 393–404 [CrossRef PubMed](#)
- 39 Pan, D., Mao, C., Quattrochi, B., Friedline, R.H., Zhu, L.J., Jung, D.Y., Kim, J.K., Lewis, B. and Wang, Y.X. (2014) MicroRNA-378 controls classical brown fat expansion to counteract obesity. *Nat. Commun.* **5**, 4725 [CrossRef PubMed](#)
- 40 Shin, S., Heo, J., Yeo, J., Lee, C. and Chung, E. (2012) Genetic association of phosphodiesterase 1B (PDE1B) with carcass traits in Korean cattle. *Mol. Biol. Rep.* **39**, 4869–4874 [CrossRef PubMed](#)
- 41 Cristancho, A.G. and Lazar, M.A. (2011) Forming functional fat: a growing understanding of adipocyte differentiation. *Nat. Rev. Mol. Cell Biol.* **12**, 722–734 [CrossRef PubMed](#)
- 42 Fu, T., Seok, S., Choi, S., Huang, Z., Suino-Powell, K., Xu, H.E., Kemper, B. and Kemper, J.K. (2014) MicroRNA 34a inhibits beige and brown fat formation in obesity in part by suppressing adipocyte fibroblast growth factor 21 signaling and SIRT1 function. *Mol. Cell. Biol.* **34**, 4130–4142 [CrossRef PubMed](#)
- 43 Qiang, L., Wang, L., Kon, N., Zhao, W., Lee, S., Zhang, Y., Rosenbaum, M., Zhao, Y., Gu, W., Farmer, S.R. and Accili, D. (2012) Brown remodeling of white adipose tissue by SirT1-dependent deacetylation of PPAR $\gamma$ . *Cell* **150**, 620–632 [CrossRef PubMed](#)
- 44 Fisher, F.M., Kleiner, S., Douris, N., Fox, E.C., Mepani, R.J., Verdeguer, F., Wu, J., Kharitononkov, A., Flier, J.S., Maratos-Flier, E. and Spiegelman, B.M. (2012) FGF21 regulates PGC-1 $\alpha$  and browning of white adipose tissues in adaptive thermogenesis. *Genes Dev.* **26**, 271–281 [CrossRef PubMed](#)
- 45 Chen, J., Cui, X., Shi, C., Chen, L., Yang, L., Pang, L., Zhang, J., Guo, X., Wang, J. and Ji, C. (2015) Differential lncRNA expression profiles in brown and white adipose tissues. *Mol. Genet. Genomics* **290**, 699–707 [CrossRef PubMed](#)
- 46 You, L.H., Zhu, L.J., Yang, L., Shi, C.M., Pang, L.X., Zhang, J., Cui, X.W., Ji, C.B. and Guo, X.R. (2015) Transcriptome analysis reveals the potential contribution of long noncoding RNAs to brown adipocyte differentiation. *Mol. Genet. Genomics* [CrossRef PubMed](#)
- 47 Sun, L., Goff, L.A., Trapnell, C., Alexander, R., Lo, K.A., Hacisuleyman, E., Sauvageau, M., Tazon-Vega, B., Kelley, D.R., Hendrickson, D.G. et al. (2013) Long noncoding RNAs regulate adipogenesis. *Proc. Natl. Acad. Sci. U.S.A.* **110**, 3387–3392 [CrossRef PubMed](#)
- 48 Hacisuleyman, E., Goff, L.A., Trapnell, C., Williams, A., Henao-Mejia, J., Sun, L., McClanahan, P., Hendrickson, D.G., Sauvageau, M., Kelley, D.R. et al. (2014) Topological organization of multichromosomal regions by the long intergenic noncoding RNA Firre. *Nat. Struct. Mol. Biol.* **21**, 198–206 [CrossRef PubMed](#)
- 49 Zhao, X.Y., Li, S., Wang, G.X., Yu, Q. and Lin, J.D. (2014) A long noncoding RNA transcriptional regulatory circuit drives thermogenic adipocyte differentiation. *Mol. Cell* **55**, 372–382 [CrossRef PubMed](#)
- 50 Alvarez-Dominguez, J.R., Bai, Z., Xu, D., Yuan, B., Lo, K.A., Yoon, M.J., Lim, Y.C., Knoll, M., Slavov, N., Chen, S. et al. (2015) *De novo* reconstruction of adipose tissue transcriptomes reveals long non-coding RNA regulators of brown adipocyte development. *Cell Metab.* **21**, 764–776 [CrossRef PubMed](#)

Received 11 June 2015/10 August 2015; accepted 14 August 2015

Accepted Manuscript online 17 August 2015, doi 10.1042/BSR20150155
